# Supplementary material for: Influenza Vaccination among Multiple Sclerosis Patients during the COVID-19 Pandemic
Source: MDPI journal article supplement (doi:10.3390/vaccines10101766), 2022-10-21
Supplement: s1 [file s1]

**Table S1.** 2020-2021 influenza vaccine recommendations. Spanish Ministry of Health.

---

*Persons 65 years or older*

*Persons less than 65 years who are at high risk of complications by influenza:*

Minors (aged 6 months and older) and adults with chronic cardiovascular disease, isolated arterial hypertension, chronic neurological disease or chronic respiratory disease

Minors (aged 6 months and older) and adults with:  
diabetes mellitus  
morbid obesity

chronic kidney disease and nephrotic syndrome  
hemoglobinopathies and anemias

hemophilia, other coagulation disorders, and chronic bleeding disorders, as well as recipients of blood products and multiple transfusions

asplenia or severe splenic dysfunction

chronic liver disease

severe neuromuscular diseases

immunosuppression

cancer

cochlear implantation or awaiting cochlear implantation

cerebrospinal fluid fistula

celiac disease

disorders and diseases leading to cognitive dysfunction (Down Syndrome, dementia or cognitive impairment)

intestinal inflammatory disease and inflammatory arthropathies -systemic erythematosis lupus, rheumatoid or juvenile arthritis-

Children between 6 months and 18 years of age, receiving prolonged treatment with acetylsalicylic acid

Persons of any age ( $\geq 6$  months) institutionalized on a prolonged basis

Children between 6 months and 2 years of age with a history of prematurity less than 32 weeks of gestation

Pregnant women in any gestational trimester

*People who can transmit influenza to those who are at high risk for complications:*

Healthcare workers

Students in internships in healthcare centers

Persons providing home care to high-risk or elderly patients

*Other groups in which vaccination is recommended:*

People working in essential public services (State security forces and corps, firefighters, civil protection services and prison staff)

Persons with direct occupational exposure to domestic fowl or pigs and also to wild birds

---
